# Supplementary material for: Modeling of Effectiveness of N3-Substituted Amidrazone Derivatives as Potential Agents against Gram-Positive Bacteria
Source: MDPI journal article supplement (doi:10.3390/molecules29102369), 2024-05-17
Supplement: s1 [file s1]

# Modeling of Effectiveness of $N^3$ -Substituted Amidrazone Derivatives as Potential Agents against Gram-Positive Bacteria

Małgorzata Ćwiklińska-Jurkowska <sup>1</sup>, Renata Paprocka <sup>2,\*</sup>, Godwin Munroe Mwaura <sup>3</sup> and Jolanta Kutkowska <sup>4</sup>

<sup>1</sup> Department of Biostatistics and Theory of Biomedical Systems, Faculty of Pharmacy, Collegium Medicum in Bydgoszcz, Nicolaus Copernicus University in Toruń, Jagiellońska Str. 15, 85-067 Bydgoszcz, Poland; mjurkowska@cm.umk.pl

<sup>2</sup> Department of Organic Chemistry, Faculty of Pharmacy, Collegium Medicum in Bydgoszcz, Nicolaus Copernicus University in Toruń, Jurasza Str. 2, 85-089 Bydgoszcz, Poland

<sup>3</sup> Department of Pharmaceutical Chemistry, Pharmaceutics and Pharmacognosy, Faculty of Health Sciences, University of Nairobi, KNH, Nairobi P.O. Box 2149-00202, Kenya; godwinmunroe1@gmail.com

<sup>4</sup> Department of Genetics and Microbiology, Institute of Biological Sciences, Maria Curie-Skłodowska University, Akademicka Str. 19, 20-033 Lublin, Poland; jolanta.kutkowska@mail.umcs.pl

\* Correspondence: renata.bursa@cm.umk.pl

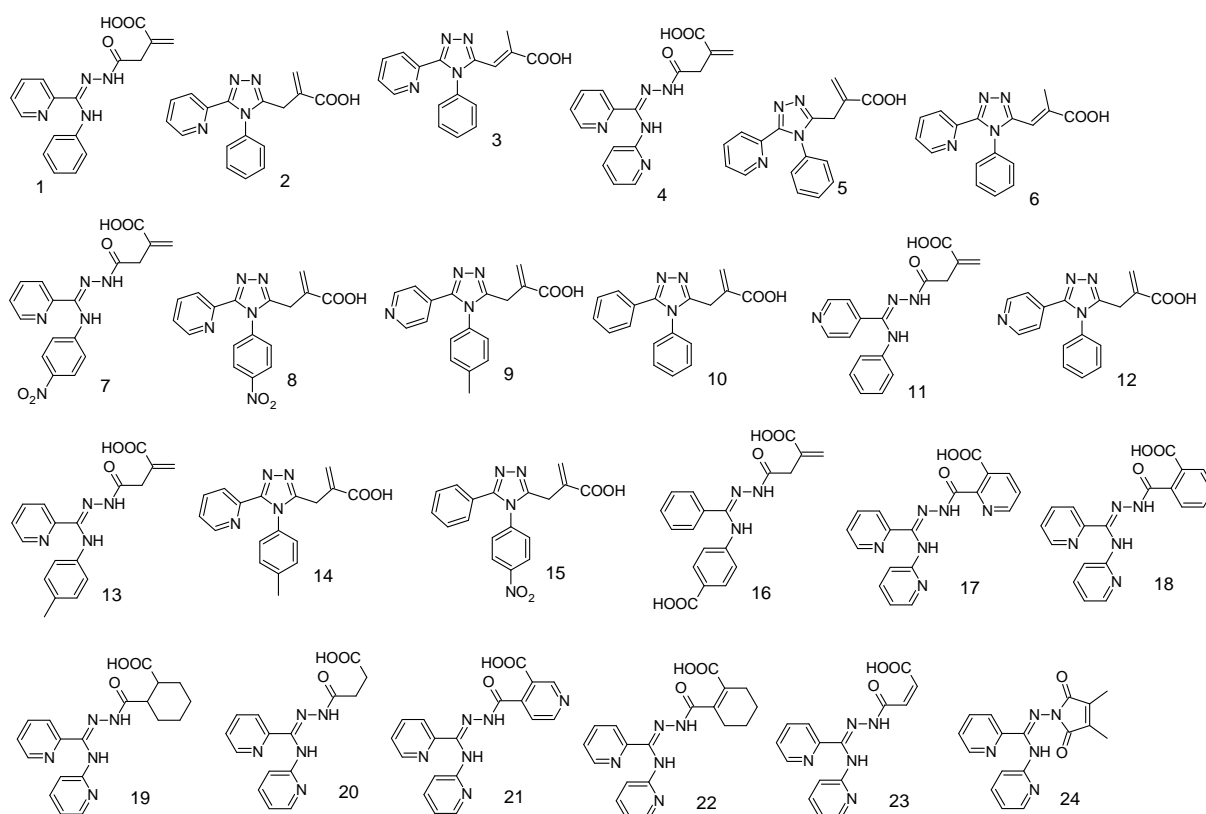

**Figure S1.** The structures of studied compounds 1-24.

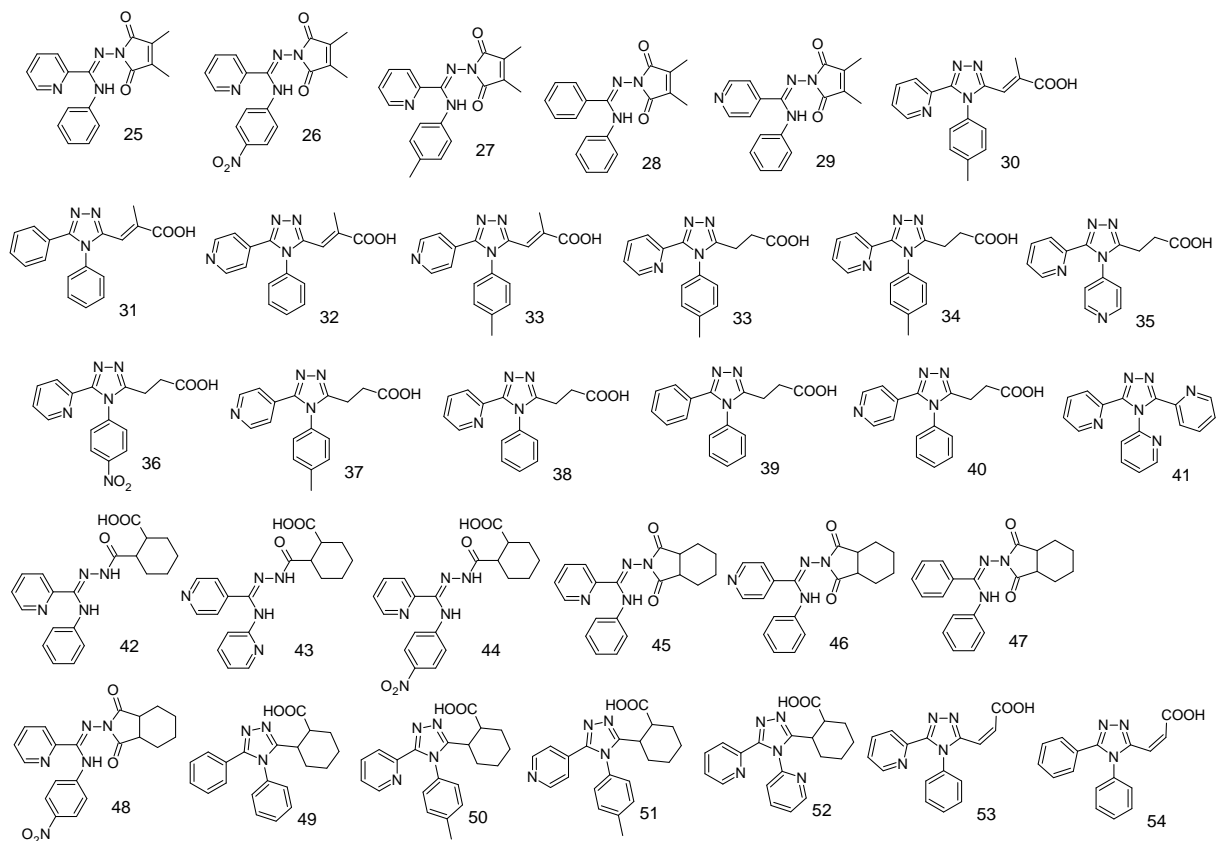

**Figure S2.** The structures of studied compounds 25-54

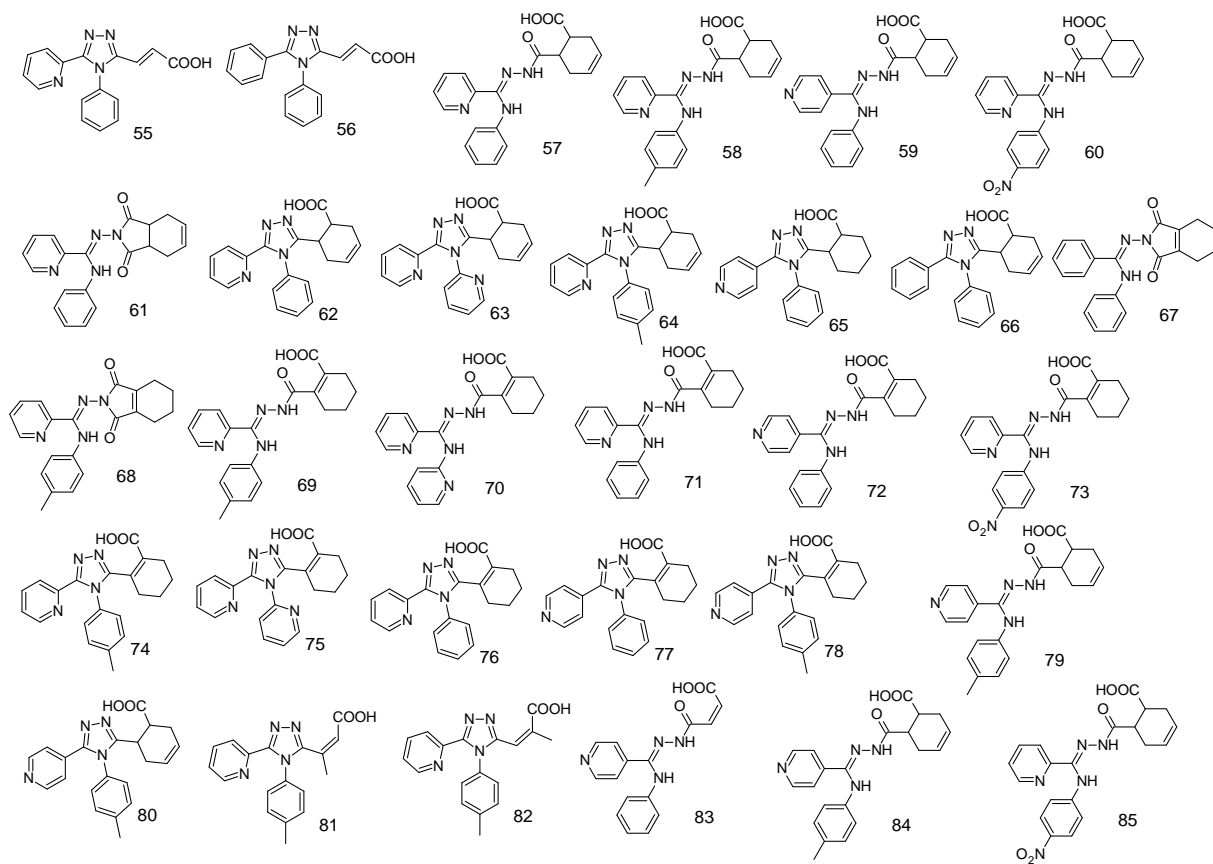

**Figure S3.** The structures of studied compounds 55-85

SMILES notation of compounds:

- 1) O=C(O)C(=C)CC(=O)N\N=C(/Nc1cccc1)c1cccn1
- 2) O=C(O)C(=C)Cc1nnc(c2cccn2)n1c1cccc1
- 3) O=C(O)C(\C)=C\c1nnc(c2cccn2)n1c1cccc1
- 4) O=C(O)C(=C)CC(=O)N\N=C(/Nc1cccn1)c1cccn1
- 5) O=C(O)C(=C)Cc1nnc(c2cccn2)n1c1cccc1
- 6) O=C(O)C(\C)=C\c1nnc(c2cccn2)n1c1cccc1
- 7) O=C(O)C(=C)CC(=O)N\N=C(/Nc1ccc(cc1)[N+](O-)=O)c1cccn1
- 8) [O-][N+](=O)c1ccc(cc1)n1c(nnc1CC(=C)C(=O)O)c1cccn1
- 9) O=C(O)C(=C)Cc1nnc(c2ccncc2)n1c1ccc(C)cc1
- 10) O=C(O)C(=C)Cc1nnc(c2ccccc2)n1c1cccc1
- 11) O=C(O)C(=C)CC(=O)N\N=C(/Nc1cccc1)c1ccncc1
- 12) O=C(O)C(=C)Cc1nnc(c2ccncc2)n1c1cccc1
- 13) O=C(O)C(=C)CC(=O)N\N=C(/Nc1ccc(C)cc1)c1cccn1
- 14) O=C(O)C(=C)Cc1nnc(c2cccn2)n1c1ccc(C)cc1
- 15) C1=CC=CC=C1C2=NN=C(CC(=C)C(O)=O)N2C3=CC=C(N(=O)=O)C=C3
- 16) O=C(O)C(=C)CC(=O)N\N=C(/Nc1ccc(cc1)[N+](O-)=O)c1cccc1
- 17) O=C(O)c1ccncc1C(=O)N\N=C(/Nc1cccn1)c1cccn1
- 18) O=C(O)c1cccc1C(=O)N\N=C(\Nc1cccn1)c1cccn1
- 19) O=C(O)[C@@H]1CCCC[C@@H]1C(=O)N\N=C(/Nc1cccn1)c1cccn1
- 20) O=C(O)CCC(=O)N\N=C(/Nc1cccn1)c1cccn1
- 21) O=C(O)c1cnccc1C(=O)N\N=C(/Nc1cccn1)c1cccn1
- 22) O=C(O)C1CC=CCC1C(=O)N\N=C(/Nc1cccn1)c1cccn1
- 23) O=C(O)/C=C\C(=O)N\N=C(/Nc1cccn1)c1cccn1
- 24) O=C1C(C)=C(C)C(=O)N1/N=C(\Nc1cccn1)c1cccn1
- 25) O=C1C(C)=C(C)C(=O)N1/N=C(\Nc1cccc1)c1cccn1
- 26) O=N(=O)c1ccc(N\C(=N/N2C(=O)C(C)=C(C)C2=O)c2cccn2)cc1
- 27) Cc1ccc(N\C(=N/N2C(=O)C(C)=C(C)C2=O)c2cccn2)cc1
- 28) O=C1C(C)=C(C)C(=O)N1/N=C(\Nc1cccc1)c1cccc1
- 29) O=C1C(C)=C(C)C(=O)N1/N=C(\Nc1cccc1)c1ccncc1
- 30) O=C(O)C(\C)=C\c1nnc(c2cccn2)n1c1ccc(C)cc1
- 31) O=C(O)C(\C)=C\c1nnc(c2ccccc2)n1c1cccc1
- 32) O=C(O)C(\C)=C\c1nnc(c2ccncc2)n1c1cccc1
- 33) O=C(O)C(\C)=C\c1nnc(c2ccncc2)n1c1ccc(C)cc1
- 34) O=C(O)CCc1nnc(c2cccn2)n1c1ccc(C)cc1
- 35) O=C(O)CCc1nnc(c2cccn2)n1c1ncccc1
- 36) [O-][N+](=O)c1ccc(cc1)n1c(nnc1CCC(=O)O)c1cccn1
- 37) O=C(O)CCc1nnc(c2ccncc2)n1c1ccc(C)cc1
- 38) O=C(O)CCc1nnc(c2cccn2)n1c1cccc1
- 39) O=C(O)CCc1nnc(c2ccccc2)n1c1cccc1
- 40) O=C(O)CCc1nnc(c2ccncc2)n1c1cccc1
- 41) c1cnc(cc1)n1c(nnc1c1cccn1)c1cccn1
- 42) O=C(O)C1CCCCC1C(=O)N\N=C(/Nc1cccc1)c1cccn1
- 43) O=C(O)C1CCCCC1C(=O)N\N=C(/Nc1cccc1)c1ccncc1
- 44) O=C(O)C1CCCCC1C(=O)N\N=C(/Nc1ccc(cc1)[N+](O-)=O)c1cccn1
- 45) O=C1C2CCCCC2C(=O)N1/N=C(/Nc1cccc1)c1cccn1
- 46) O=C1C2CCCCC2C(=O)N1/N=C(/Nc1cccc1)c1ccncc1

47) O=C1C2CCCCC2C(=O)N1/N=C(/Nc1cccc1)c1cccc1  
 48) [O-][N+](=O)c1ccc(cc1)N/C(=N/N1C(=O)C2CCCCC2C1=O)c1cccc1  
 49) O=C(O)C1CCCCC1c1nnc(c2cccc2)n1c1cccc1  
 50) O=C(O)C1CCCCC1c1nnc(c2cccn2)n1c1ccc(C)cc1  
 51) O=C(O)C1CCCCC1c1nnc(c2ccncc2)n1c1ccc(C)cc1  
 52) O=C(O)C1CCCCC1c1nnc(c2cccn2)n1c1ncccc1  
 53) O=C(O)/C=C\c1nnc(c2cccn2)n1c1cccc1  
 54) O=C(O)/C=C\c1nnc(c2cccc2)n1c1cccc1  
 55) O=C(O)/C=C/c1nnc(c2cccn2)n1c1cccc1  
 56) O=C(O)/C=C/c1nnc(c2cccc2)n1c1cccc1  
 57) O=C(O)C1CC=CCC1C(=O)N\N=C(/Nc1cccc1)c1cccn1  
 58) O=C(O)C1CC=CCC1C(=O)N\N=C(/Nc1ccc(C)cc1)c1cccn1  
 59) O=C(O)C1CC=CCC1C(=O)N\N=C(/Nc1cccc1)c1ccncc1  
 60) O=C(O)C1CC=CCC1C(=O)N\N=C(/Nc1ccc(cc1)[N+](O-)=O)c1ccncc1  
 61) O=C1C2CC=CCC2C(=O)N1/N=C(\Nc1cccc1)c1cccn1  
 62) O=C(O)C1CC=CCC1c1nnc(c2cccn2)n1c1cccc1  
 63) O=C(O)C1CC=CCC1c1nnc(c2cccn2)n1c1ncccc1  
 64) O=C(O)C1CC=CCC1c1nnc(c2cccn2)n1c1ccc(C)cc1  
 65) O=C(O)C1CC=CCC1c1nnc(c2ccncc2)n1c1cccc1  
 66) O=C(O)C1CC=CCC1c1nnc(c2cccc2)n1c1cccc1  
 67) O=C1C=2CCCCC=2C(=O)N1/N=C(\Nc1cccc1)c1cccc1  
 68) Cc1ccc(cc1)N\C(=N/N1C(=O)C=2CCCCC=2C1=O)c1cccn1  
 69) O=C(O)C=1CCCCC=1C(=O)N\N=C(/Nc1ccc(C)cc1)c1cccn1  
 70) O=C(O)C=1CCCCC=1C(=O)N\N=C(/Nc1cccn1)c1cccn1  
 71) O=C(O)C=1CCCCC=1C(=O)N\N=C(/Nc1cccc1)c1cccn1  
 72) O=C(O)C=1CCCCC=1C(=O)N\N=C(/Nc1cccc1)c1ccncc1  
 73) O=C(O)C=1CCCCC=1C(=O)N\N=C(/Nc1ccc(cc1)[N+](O-)=O)c1cccn1  
 74) O=C(O)C=1CCCCC=1c1nnc(c2cccn2)n1c1ccc(C)cc1  
 75) O=C(O)C=1CCCCC=1c1nnc(c2cccn2)n1c1ncccc1  
 76) O=C(O)C=1CCCCC=1c1nnc(c2cccn2)n1c1cccc1  
 77) O=C(O)C=1CCCCC=1c1nnc(c2ccncc2)n1c1cccc1  
 78) O=C(O)C=1CCCCC=1C(=O)N\N=C(/Nc1ccc(C)cc1)c1ccncc1  
 79) O=C(O)C1CC=CCC1C(=O)N\N=C(/Nc1ccc(C)cc1)c1ccncc1  
 80) O=C(O)C1CC=CCC1c1nnc(c2ccncc2)n1c1ccc(C)cc1  
 81) O=C(O)\C=C(\C)c1nnc(c2cccn2)n1c1ccc(C)cc1  
 82) O=C(O)C(/C)=C\c1nnc(c2cccn2)n1c1ccc(C)cc1  
 83) O=C(O)/C=C\C(=O)NNC(Nc1cccc1)c1ccncc1  
 84) O=C(O)/C=C\C(=O)NNC(Nc1ccc(C)cc1)c1ccncc1  
 85) [O-][N+](=O)c1ccc(cc1)NC(NNC(=O)\C=C/C(=O)O)c1cccn1

Table S1. *S. aureus*. LASSO models were selected according to criteria. Fit statistics with F-values from ANOVA (n=83).

[illegible]

Table S2. *S. aureus*. LAR models were selected according to criteria. Fit statistics with F-values from ANOVA (n=83).

[illegible]

**Table S3.** *S. aureus*. Stepwise models were selected according to criteria. Fit statistics with F-values from ANOVA (n=83).

|                                     | Model 1<br>by Adj R <sup>2</sup> | Model 2<br>by AIC | Model 3<br>by AICC | Model 4<br>by BIC | Model 5<br>by C(p) | Model 6<br>by SBC | Model 7 by<br>PRESS | Model 8 by<br>ASE Val |
|-------------------------------------|----------------------------------|-------------------|--------------------|-------------------|--------------------|-------------------|---------------------|-----------------------|
| Root MSE                            | 265.36196                        | 265.36196         | 265.36196          | 265.36196         | 265.36196          | 267.40487         | 265.36196           | 271.43058             |
| Dependent<br>Mean                   | 446.85542                        | 446.85542         | 446.85542          | 446.85542         | 446.85542          | 446.85542         | 446.85542           | 456.18966             |
| R <sup>2</sup>                      | 0.4415                           | 0.4415            | 0.4415             | 0.4415            | 0.4415             | 0.4256            | 0.4415              | 0.4321                |
| Adj R <sup>2</sup>                  | <b>0.4129</b>                    | 0.4129            | 0.4129             | 0.4129            | 0.4129             | 0.4038            | 0.4129              | 0.4115                |
| AIC                                 | 1016.30479                       | <b>1016.30479</b> | 1016.30479         | 1016.30479        | 1016.30479         | 1016.63520        | 1016.30479          | 712.94957             |
| AICC                                | 1017.41006                       | 1017.41006        | <b>1017.41006</b>  | 1017.41006        | 1017.41006         | 1017.41442        | 1017.41006          | 713.70429             |
| BIC                                 | 933.71305                        | 933.71305         | 933.71305          | <b>933.71305</b>  | 933.71305          | 933.73361         | 933.71305           | 656.38475             |
| C(p)                                | 6.71841                          | 6.71841           | 6.71841            | 6.71841           | <b>6.71841</b>     | 6.98840           | 6.71841             | -6.04460              |
| SBC                                 | 943.39900                        | 943.39900         | 943.39900          | 943.39900         | 943.39900          | <b>941.31057</b>  | 943.39900           | 659.13090             |
| PRESS                               | 6270484                          | 6270484           | 6270484            | 6270484           | 6270484            | 6295028           | <b>6270484</b>      | 4571450               |
| ASE<br>(Train)<br>ASE<br>(Validate) | 66175                            | 66175             | 66175              | 66175             | 66175              | 68059             | 66175               | <b>81736</b>          |
| #effects                            | 5                                | 5                 | 5                  | 5                 | 5                  | 4                 | 5                   | 3                     |
| df1                                 | 4                                | 4                 | 4                  | 4                 | 4                  | 3                 | 4                   | 2                     |
| df2                                 | 78                               | 78                | 78                 | 78                | 78                 | 79                | 78                  | 55                    |
| F                                   | 15.41                            | 15.41             | 15.41              | 15.41             | 15.41              | 9.51              | 15.41               | 20.93                 |
| p                                   | <.0001                           | <.0001            | <.0001             | <.0001            | <.0001             | <.0001            | <.0001              | <.0001                |

**Table S4.** *N. corralina*. LASSO models were selected according to criteria. Fit statistics with F-values from ANOVA (n=50).

|                                     | Model 1<br>by Adj R <sup>2</sup> | Model 2<br>by AIC | Model 3<br>by AICC | Model 4<br>by BIC | Model 5<br>by C(p) | Model 6<br>by SBC | Model 7 by<br>ASE Val |
|-------------------------------------|----------------------------------|-------------------|--------------------|-------------------|--------------------|-------------------|-----------------------|
| Root MSE                            | 195.25517                        | 196.18997         | 196.18997          | 196.18997         | 195.25517          | 226.77668         | 177.39697             |
| Dependent<br>Mean                   | 325.18000                        | 325.18000         | 325.18000          | 325.18000         | 325.18000          | 325.18000         | 310.05556             |
| R <sup>2</sup>                      | 0.3646                           | 0.3432            | 0.3432             | 0.3432            | 0.3646             | 0.0000            | 0.4884                |
| Adj R <sup>2</sup>                  | <b>0.2587</b>                    | 0.2516            | 0.2516             | 0.2516            | 0.2587             | 0.0000            | 0.3369                |
| AIC                                 | 586.71306                        | <b>586.36720</b>  | 586.36720          | 586.36720         | 586.71306          | 595.38644         | 418.48752             |
| AICC                                | 591.21306                        | 589.87940         | <b>589.87940</b>   | 589.87940         | 591.21306          | 595.64176         | 427.28752             |
| BIC                                 | 532.14881                        | 531.99742         | 531.99742          | <b>531.99742</b>  | 532.14881          | 543.72406         | 384.65953             |
| C(p)                                | 35.03786                         | 35.36004          | 35.36004           | 35.36004          | <b>35.03786</b>    | 60.64902          | 14.07613              |
| SBC                                 | 550.00924                        | 547.75136         | 547.75136          | 547.75136         | 550.00924          | <b>545.29846</b>  | 394.73919             |
| ASE<br>(Train)<br>ASE<br>(Validate) | 32025                            | 33102             | 33102              | 33102             | 32025              | 50399             | <b>36053</b>          |
| #effects                            | 8                                | 7                 | 7                  | 7                 | 8                  | 1                 | 9                     |
| df1                                 | 7                                | 6                 | 6                  | 6                 | 7                  | 0                 | 8                     |
| df2                                 | 42                               | 43                | 43                 | 43                | 42                 | 49                | 27                    |
| F                                   | 3.44                             | 3.74              | 3.74               | 3.74              | 3.44               | .                 | 3.22                  |
| P                                   | 0.0053                           | 0.0044            | 0.0044             | 0.0044            | 0.0053             | .                 | 0.0106                |

**Table S5.** *N. corralina*. LAR models were selected according to criteria. Fit statistics with F-values from ANOVA (n=50).

[illegible]

Table S6. *N. corralina*. Stepwise models were selected according to criteria. Fit statistics with F-values from ANOVA (n=50).

[illegible]

**Table S7.** *M. luteus*. LASSO models were selected according to criteria. Fit statistics with F-values from ANOVA (n=56).

|                    | Model 1<br>by Adj R <sup>2</sup> | Model 2<br>by AIC | Model 3<br>by AICC | Model 4<br>by BIC | Model 5<br>by C(p) | Model 6<br>by SBC | Model 7 by<br>ASE Val |
|--------------------|----------------------------------|-------------------|--------------------|-------------------|--------------------|-------------------|-----------------------|
| Root MSE           | 233.55646                        | 235.18652         | 235.18652          | 235.18652         | 233.55646          | 235.18652         | 186.51987             |
| Dependent Mean     | 324.76786                        | 324.76786         | 324.76786          | 324.76786         | 324.76786          | 324.76786         | 315.41463             |
| R <sup>2</sup>     | 0.2658                           | 0.2257            | 0.2257             | 0.2257            | 0.2658             | 0.2257            | 0.3949                |
| Adj R <sup>2</sup> | <b>0.1924</b>                    | 0.1811            | 0.1811             | 0.1811            | 0.1924             | 0.1811            | 0.2192                |
| AIC                | 674.43706                        | <b>673.41239</b>  | 673.41239          | 673.41239         | 674.43706          | 673.41239         | 480.27712             |
| AICC               | 676.77040                        | 674.61239         | <b>674.61239</b>   | 674.61239         | 676.77040          | 674.61239         | 489.38056             |
| BIC                | 614.56773                        | 614.43655         | 614.43655          | <b>614.43655</b>  | 614.56773          | 614.43655         | 436.06227             |
| C(p)               | 36.78014                         | 37.18813          | 37.18813           | 37.18813          | <b>36.78014</b>    | 37.18813          | 27.70738              |
| SBC                | 628.58917                        | 623.51380         | 623.51380          | 623.51380         | 628.58917          | <b>623.51380</b>  | 454.41284             |
| ASE                | 48704                            | 51362             | 51362              | 51362             | 48704              | 51362             | 26304                 |
| (Train)<br>ASE     |                                  |                   |                    |                   |                    |                   | <b>120404</b>         |
| (Validate)         |                                  |                   |                    |                   |                    |                   |                       |
| #effects           | 6                                | 4                 | 4                  | 4                 | 6                  | 4                 | 10                    |
| df1                | 5                                | 3                 | 3                  | 3                 | 5                  | 3                 | 9                     |
| df2                | 50                               | 52                | 52                 | 52                | 50                 | 52                | 31                    |
| F                  | 3.62                             | 5.05              | 5.05               | 5.05              | 3.62               | 5.05              | 2.25                  |
| P                  | 0.0071                           | 0.0038            | 0.0038             | 0.0038            | 0.0071             | 0.0038            | 0.0455                |

**Table S8.** *M. luteus*. LAR models were selected according to criteria. Fit statistics with F-values from ANOVA (n=56).

|                    | Model 1<br>by Adj R <sup>2</sup> | Model 2<br>by AIC | Model 3<br>by AICC | Model 4<br>by BIC | Model 5<br>by C(p) | Model 6<br>by SBC | Model 7 by<br>ASE Val |
|--------------------|----------------------------------|-------------------|--------------------|-------------------|--------------------|-------------------|-----------------------|
| Root MSE           | 217.45418                        | 231.39791         | 231.39791          | 217.45418         | 217.45418          | 231.39791         | 213.85843             |
| Dependent Mean     | 324.76786                        | 324.76786         | 324.76786          | 324.76786         | 324.76786          | 324.76786         | 273.75000             |
| R <sup>2</sup>     | 0.4145                           | 0.2217            | 0.2217             | 0.4145            | 0.4145             | 0.2217            | 0.4662                |
| Adj R <sup>2</sup> | <b>0.2999</b>                    | 0.2072            | 0.2072             | 0.2999            | 0.2999             | 0.2072            | 0.2814                |
| AIC                | 669.76690                        | <b>669.70695</b>  | 669.70695          | 669.76690         | 669.76690          | 669.70695         | 432.58742             |
| AICC               | 675.76690                        | 670.16849         | <b>670.16849</b>   | 675.76690         | 675.76690          | 670.16849         | 443.58742             |
| BIC                | 611.11767                        | 612.08309         | 612.08309          | <b>611.11767</b>  | 611.11767          | 612.08309         | 387.75820             |
| C(p)               | 28.42349                         | 33.63740          | 33.63740           | 28.42349          | <b>28.42349</b>    | 33.63740          | 46.44838              |
| SBC                | 632.02041                        | 615.75766         | 615.75766          | 632.02041         | 632.02041          | <b>615.75766</b>  | 410.42261             |
| ASE                | 38842                            | 51633             | 51633              | 38842             | 38842              | 51633             | 33031                 |
| (Train)<br>ASE     |                                  |                   |                    |                   |                    |                   | <b>68963</b>          |
| (Validate)         |                                  |                   |                    |                   |                    |                   |                       |
| #effects           | 10                               | 2                 | 2                  | 10                | 10                 | 2                 | 10                    |
| df1                | 9                                | 1                 | 1                  | 9                 | 9                  | 1                 | 9                     |
| df2                | 46                               | 54                | 54                 | 46                | 46                 | 54                | 26                    |
| F                  | 3.62                             | 15.38             | 15.38              | 3.62              | 3.62               | 15.38             | 3.52                  |
| P                  | 0.0018                           | 0.0003            | 0.0003             | 0.0018            | 0.0018             | 0.0003            | 0.0315                |



**Table S9.** *M. luteus*. Stepwise models were selected according to criteria. Fit statistics with F-values from ANOVA (n=56).

|                    | Model 1<br>by Adj R <sup>2</sup> | Model 2<br>by AIC | Model 3<br>by AICC | Model 4<br>by BIC | Model 5<br>by C(p) | Model 6<br>by SBC | Model 7 by<br>PRESS | Model 8 by<br>ASE Val |
|--------------------|----------------------------------|-------------------|--------------------|-------------------|--------------------|-------------------|---------------------|-----------------------|
| Root MSE           | 208.50396                        | 208.50396         | 210.96974          | 208.50396         | 208.50396          | 226.24808         | 208.50396           | 179.17653             |
| Dependent<br>Mean  | 324.76786                        | 324.76786         | 324.76786          | 324.76786         | 324.76786          | 324.76786         | 324.76786           | 315.41463             |
| R <sup>2</sup>     | 0.4149                           | 0.4149            | 0.3890             | 0.4149            | 0.4149             | 0.2559            | 0.4149              | 0.3155                |
| Adj R <sup>2</sup> | <b>0.3564</b>                    | 0.3564            | 0.3410             | 0.3564            | 0.3564             | 0.2421            | 0.3564              | 0.2795                |
| AIC                | 661.72889                        | <b>661.72889</b>  | 662.15459          | 661.72889         | 661.72889          | 667.18621         | 661.72889           | 471.33104             |
| AICC               | 664.06223                        | 664.06223         | <b>663.86888</b>   | 664.06223         | 664.06223          | 667.64774         | 664.06223           | 472.44215             |
| BIC                | 604.13307                        | 604.13307         | 604.42844          | <b>604.13307</b>  | 604.13307          | 609.72264         | 604.13307           | 428.66496             |
| C(p)               | 20.37978                         | 20.37978          | 21.22974           | 20.37978          | <b>20.37978</b>    | 29.86805          | 20.37978            | 20.09710              |
| SBC                | 615.88100                        | 615.88100         | 614.28135          | 615.88100         | 615.88100          | <b>613.23691</b>  | 615.88100           | 433.47176             |
| PRESS              | 2829990                          | 2829990           | 2842419            | 2829990           | 2829990            | 3050217           | <b>2829990</b>      | 1484692               |
| ASE<br>(Train)     | 38816                            | 38816             | 40534              | 38816             | 38816              | 49360             | 38816               | 29755                 |
| ASE<br>(Validate)  |                                  |                   |                    |                   |                    |                   |                     | <b>119037</b>         |
| #effects           | 6                                | 6                 | 5                  | 6                 | 6                  | 2                 | 6                   | 3                     |
| df1                | 5                                | 5                 | 4                  | 5                 | 5                  | 1                 | 5                   | 2                     |
| df2                | 50                               | 50                | 51                 | 50                | 50                 | 54                | 50                  | 38                    |
| F                  | 7.09                             | 7.09              | 8.12               | 7.09              | 7.09               | 18.57             | 7.09                | 8.76                  |
| p                  | <.0001                           | <.0001            | <.0001             | <.0001            | <.0001             | <.0001            | <.0001              | 0.0007                |

**Table S10.** *E. faecalis*. LASSO models were selected according to criteria. Fit statistics with F-values from ANOVA (n=56).

|                    | Model 1<br>by Adj R <sup>2</sup> | Model 2<br>by AIC | Model 3<br>by AICC | Model 4<br>by BIC | Model 5<br>by C(p) | Model 6<br>by SBC | Model 7 by<br>ASE Val |
|--------------------|----------------------------------|-------------------|--------------------|-------------------|--------------------|-------------------|-----------------------|
| Root MSE           | 333.65516                        | 347.09687         | 347.09687          | 336.26777         | 333.65516          | 347.09687         | 327.81391             |
| Dependent<br>Mean  | 487.62500                        | 487.62500         | 487.62500          | 487.62500         | 487.62500          | 487.62500         | 447.58537             |
| R <sup>2</sup>     | 0.2272                           | 0.0000            | 0.0000             | 0.1297            | 0.2272             | 0.0000            | 0.0184                |
| Adj R <sup>2</sup> | <b>0.0760</b>                    | 0.0000            | 0.0000             | 0.0614            | 0.0760             | 0.0000            | -.0068                |
| AIC                | 717.71632                        | <b>714.14660</b>  | 714.14660          | 714.36821         | 717.71632          | 714.14660         | 519.93015             |
| AICC               | 723.71632                        | 714.37302         | <b>714.37302</b>   | 716.08250         | 723.71632          | 714.37302         | 520.57880             |
| BIC                | 655.46927                        | 656.79781         | 656.79781          | <b>654.26550</b>  | 655.46927          | 656.79781         | 476.31353             |
| C(p)               | 44.36297                         | 49.98401          | 49.98401           | 44.49886          | <b>44.36297</b>    | 49.98401          | 48.29459              |
| SBC                | 679.96984                        | 658.17195         | 658.17195          | 666.49497         | 679.96984          | <b>658.17195</b>  | 480.35730             |
| ASE<br>(Train)     | 91446                            | 118325            | 118325             | 102980            | 91446              | 118325            | 102220                |
| ASE<br>(Validate)  |                                  |                   |                    |                   |                    |                   | <b>156836</b>         |
| #effects           | 10                               | 1                 | 1                  | 5                 | 10                 | 1                 | 2                     |
| df1                | 9                                | 0                 | 0                  | 4                 | 9                  | 0                 | 1                     |
| df2                | 46                               | 55                | 55                 | 51                | 46                 | 55                | 39                    |
| F                  | 1.50                             | .                 | .                  | 1.90              | 1.50               | .                 | 0.73                  |
| p                  | 0.1757                           | .                 | .                  | 0.1247            | 0.1757             | .                 | 0.3979                |

**Table S11.** *E. faecalis*. LAR models were selected according to criteria. Fit statistics with F-values from ANOVA (n=56).

|                    | Model 1<br>by Adj R <sup>2</sup> | Model 2<br>by AIC | Model 3<br>by AICC | Model 4<br>by BIC | Model 5<br>by C(p) | Model 6<br>by SBC | Model 7 by<br>ASE Val |
|--------------------|----------------------------------|-------------------|--------------------|-------------------|--------------------|-------------------|-----------------------|
| Root MSE           | 322.86408                        | 323.42089         | 347.09687          | 323.42089         | 323.42089          | 347.09687         | 343.41683             |
| Dependent<br>Mean  | 487.62500                        | 487.62500         | 487.62500          | 487.62500         | 487.62500          | 487.62500         | 485.27778             |
| R <sup>2</sup>     | 0.2763                           | 0.2581            | 0.0000             | 0.2581            | 0.2581             | 0.0000            | 0.3632                |
| Adj R <sup>2</sup> | <b>0.1348</b>                    | 0.1318            | 0.0000             | 0.1318            | 0.1318             | 0.0000            | 0.1428                |
| AIC                | 714.03414                        | <b>713.43148</b>  | 714.14660          | 713.43148         | 713.43148          | 714.14660         | 466.68883             |
| AICC               | 720.03414                        | 718.32037         | <b>714.37302</b>   | 718.32037         | 718.32037          | 714.37302         | 477.68883             |
| BIC                | 652.78723                        | 652.34661         | 656.79781          | <b>652.34661</b>  | 652.34661          | 656.79781         | 436.43878             |
| C(p)               | 39.24883                         | 39.15009          | 49.98401           | 39.15009          | <b>39.15009</b>    | 49.98401          | 11.77187              |
| SBC                | 676.28766                        | 673.65965         | 658.17195          | 673.65965         | 673.65965          | <b>658.17195</b>  | 444.52402             |
| ASE                | 85627                            | 87790             | 118325             | 87790             | 87790              | 118325            | 85175                 |
| (Train)            |                                  |                   |                    |                   |                    |                   |                       |
| ASE                |                                  |                   |                    |                   |                    |                   | <b>81073</b>          |
| (Validate)         |                                  |                   |                    |                   |                    |                   |                       |
| #effects           | 10                               | 9                 | 1                  | 9                 | 9                  | 1                 | 10                    |
| df1                | 9                                | 8                 | 0                  | 8                 | 8                  | 0                 | 9                     |
| df2                | 46                               | 47                | 55                 | 47                | 47                 | 55                | 26                    |
| F                  | 1.95                             | 2.04              | .                  | 2.04              | 2.04               | .                 | 1.65                  |
| p                  | 0.0677                           | 0.0614            | .                  | 0.0614            | 0.0614             | .                 | 0.1535                |

**Table S12.** *E. faecalis*. Stepwise models were selected according to criteria. Fit statistics with F-values from ANOVA (n=56).

[illegible]

**Table S13.** *M. smegmatis*. LASSO models were selected according to criteria. Fit statistics with F-values from ANOVA (n=85).

|                        | Model 1<br>by Adj R <sup>2</sup> | Model 2<br>by AIC | Model 3<br>by AICC | Model 4<br>by BIC | Model 5<br>by C(p) | Model 6<br>by SBC | Model 7 by<br>ASE Val |
|------------------------|----------------------------------|-------------------|--------------------|-------------------|--------------------|-------------------|-----------------------|
| Root MSE               | 256.72843                        | 257.34438         | 257.34438          | 257.34438         | 257.34438          | 279.08036         | 271.91516             |
| Dependent Mean         | 389.55294                        | 389.55294         | 389.55294          | 389.55294         | 389.55294          | 389.55294         | 377.43333             |
| R <sup>2</sup>         | 0.2646                           | 0.2307            | 0.2307             | 0.2307            | 0.2307             | 0.0000            | 0.1055                |
| Adj R <sup>2</sup>     | <b>0.1538</b>                    | 0.1497            | 0.1497             | 0.1497            | 0.1497             | 0.0000            | 0.0575                |
| AIC                    | 1041.22690                       | <b>1039.05756</b> | 1039.05756         | 1039.05756        | 1039.05756         | 1045.34903        | 738.51924             |
| AICC                   | 1046.35366                       | 1042.03053        | <b>1042.03053</b>  | 1042.03053        | 1042.03053         | 1045.49537        | 739.63035             |
| BIC                    | 955.59006                        | 952.79916         | 952.79916          | <b>952.79916</b>  | 952.79916          | 959.61954         | 677.92277             |
| C(p)                   | 26.31173                         | 24.33659          | 24.33659           | 24.33659          | <b>24.33659</b>    | 35.72430          | 12.74016              |
| SBC                    | 983.53872                        | 974.04142         | 974.04142          | 974.04142         | 974.04142          | <b>960.79168</b>  | 684.89662             |
| ASE                    | 56605                            | 59214             | 59214              | 59214             | 59214              | 76970             | 69009                 |
| (Train)<br>ASE         |                                  |                   |                    |                   |                    |                   | <b>76803</b>          |
| (Validate)<br>#effects | 12                               | 9                 | 9                  | 9                 | 9                  | 1                 | 4                     |
| df1                    | 11                               | 8                 | 8                  | 8                 | 8                  | 0                 | 3                     |
| df2                    | 73                               | 76                | 76                 | 76                | 76                 | 84                | 56                    |
| F                      | 2.39                             | 2.85              | 2.85               | 2.85              | 2.85               | .                 | 2.20                  |
| p                      | 0.0138                           | 0.0080            | 0.0080             | 0.0080            | 0.0080             | .                 | 0.0981                |

**Table S14.** *M. smegmatis*. LAR models were selected according to criteria. Fit statistics with F-values from ANOVA (n=85).

|                        | Model 1<br>by Adj R <sup>2</sup> | Model 2<br>by AIC | Model 3<br>by AICC | Model 4<br>by BIC | Model 5<br>by C(p) | Model 6<br>by SBC | Model 7 by<br>ASE Val |
|------------------------|----------------------------------|-------------------|--------------------|-------------------|--------------------|-------------------|-----------------------|
| Root MSE               | 264.91501                        | 275.27694         | 277.12018          | 275.27694         | 264.91501          | 279.08036         | 278.36051             |
| Dependent Mean         | 389.55294                        | 389.55294         | 389.55294          | 389.55294         | 389.55294          | 389.55294         | 374.82143             |
| R <sup>2</sup>         | 0.2277                           | 0.0502            | 0.0257             | 0.0502            | 0.2277             | 0.0000            | 0.0045                |
| Adj R <sup>2</sup>     | <b>0.0989</b>                    | 0.0271            | 0.0140             | 0.0271            | 0.0989             | 0.0000            | 0.0000                |
| AIC                    | 1047.39080                       | <b>1044.96798</b> | 1045.13281         | 1044.96798        | 1047.39080         | 1045.34903        | 690.40212             |
| AICC                   | 1053.39080                       | 1045.46798        | <b>1045.42911</b>  | 1045.46798        | 1053.39080         | 1045.49537        | 690.86366             |
| BIC                    | 960.48168                        | 958.36964         | 958.93163          | <b>958.36964</b>  | 960.48168          | 959.61954         | 632.00131             |
| C(p)                   | 32.69537                         | 33.76006          | 34.66879           | 33.76006          | <b>32.69537</b>    | 35.72430          | 56.39626              |
| SBC                    | 992.14527                        | 965.29593         | 963.01811          | 965.29593         | 992.14527          | <b>960.79168</b>  | 636.45283             |
| ASE                    | 59447                            | 73103             | 74989              | 73103             | 59447              | 76970             | 74717                 |
| (Train)<br>ASE         |                                  |                   |                    |                   |                    |                   | <b>81279</b>          |
| (Validate)<br>#effects | 13                               | 3                 | 2                  | 3                 | 13                 | 1                 | 2                     |
| df1                    | 12                               | 2                 | 1                  | 2                 | 12                 | 0                 | 1                     |
| df2                    | 72                               | 82                | 83                 | 82                | 72                 | 84                | 54                    |
| F                      | 1.77                             | 2.17              | 2.19               | 2.17              | 1.77               | .                 | 0.25                  |
| p                      | 0.0701                           | 0.1208            | 0.1425             | 0.1208            | 0.0701             | .                 | 0.6220                |

Table S15. *M. smegmatis*. Stepwise models were selected according to criteria. Fit statistics with F-values from ANOVA (n=85).

|                        | Model 1<br>by Adj R <sup>2</sup> | Model 2<br>by AIC | Model 3<br>by AICC | Model 4<br>by BIC | Model 5<br>by C(p) | Model 6<br>by SBC | Model 7 by<br>PRESS | Model 8 by<br>ASE Val |
|------------------------|----------------------------------|-------------------|--------------------|-------------------|--------------------|-------------------|---------------------|-----------------------|
| Root MSE               | 270.26626                        | 270.26626         | 270.26626          | 270.26626         | 270.26626          | 270.26626         | 270.26626           | 269.47613             |
| Dependent Mean         | 389.55294                        | 389.55294         | 389.55294          | 389.55294         | 389.55294          | 389.55294         | 389.55294           | 377.43333             |
| R <sup>2</sup>         | 0.0733                           | 0.0733            | 0.0733             | 0.0733            | 0.0733             | 0.0733            | 0.0733              | 0.0900                |
| Adj R <sup>2</sup>     | <b>0.0622</b>                    | 0.0622            | 0.0622             | 0.0622            | 0.0622             | 0.0622            | 0.0622              | 0.0744                |
| AIC                    | 1040.87539                       | <b>1040.87539</b> | 1040.87539         | 1040.87539        | 1040.87539         | 1040.87539        | 1040.87539          | 735.54348             |
| AICC                   | 1041.17169                       | 1041.17169        | <b>1041.17169</b>  | 1041.17169        | 1041.17169         | 1041.17169        | 1041.17169          | 735.97205             |
| BIC                    | 954.86238                        | 954.86238         | 954.86238          | <b>954.86238</b>  | 954.86238          | 954.86238         | 954.86238           | 675.17206             |
| C(p)                   | 29.01795                         | 29.01795          | 29.01795           | 29.01795          | <b>29.01795</b>    | 29.01795          | 29.01795            | 9.85481               |
| SBC                    | 958.76069                        | 958.76069         | 958.76069          | 958.76069         | 958.76069          | <b>958.76069</b>  | 958.76069           | 677.73217             |
| PRESS                  | 6386438                          | 6386438           | 6386438            | 6386438           | 6386438            | 6386438           | <b>6386438</b>      | 4554349               |
| ASE                    | 71325                            | 71325             | 71325              | 71325             | 71325              | 71325             | 71325               | 70197                 |
| (Train)<br>ASE         |                                  |                   |                    |                   |                    |                   |                     | <b>74998</b>          |
| (Validate)<br>#effects | 2                                | 2                 | 2                  | 2                 | 2                  | 2                 | 2                   | 2                     |
| df1                    | 1                                | 1                 | 1                  | 1                 | 1                  | 1                 | 1                   | 1                     |
| df2                    | 83                               | 83                | 83                 | 83                | 83                 | 83                | 83                  | 58                    |
| F                      | 6.57                             | 6.57              | 6.57               | 6.57              | 6.57               | 6.57              | 6.57                | 5.74                  |
| p                      | 0.0122                           | 0.0122            | 0.0122             | 0.0122            | 0.0122             | 0.0122            | 0.0122              | 0.0198                |

Table S16. *N. corralina*. Parameter estimates for LASSO models were optimized by seven fit criteria.

| Parameter                                | Estimate $b_i$      |                     |                |                     | Standardized estimate $\beta_i$ |                    |         |                   | Mean selection percentage from Bootstrap |
|------------------------------------------|---------------------|---------------------|----------------|---------------------|---------------------------------|--------------------|---------|-------------------|------------------------------------------|
|                                          | Model 1 and 5 **    | Model 2, 3 and 4**  | Model 6        | Model 7*            | Model 1 and 5 **                | Model 2, 3 and 4** | Model 6 | Model 7*          |                                          |
| Intercept                                | 1565.2074<br>24     | 1428.752<br>033     | 325.1800<br>00 | 1131.4220<br>88     | 0                               | 0                  | 0       | 0                 |                                          |
| MW                                       | -0.201253           |                     |                |                     | -<br>0.02596<br>5               |                    |         |                   | 15.75                                    |
| PASS_antiinflam                          | -<br>449.49409<br>8 | -<br>371.8249<br>39 |                | -<br>219.37778<br>6 | -<br>0.33677<br>3               | -<br>0.27858<br>1  |         | -<br>0.18086<br>0 | 13.28                                    |
| Acceptors_H                              | -<br>146.01472<br>8 | -<br>136.6818<br>98 |                |                     | -<br>0.89179<br>3               | -<br>0.83479<br>2  |         |                   | 20.89                                    |
| meltingTemp*R2_substituent_2-pyridyl     | 0.393353            | 0.335244            |                |                     | 0.13704<br>5                    | 0.11680<br>0       |         |                   | 27.11                                    |
| meltingTemp*R2_substituent_4-nitrophenyl | 1.843860            | 1.705703            |                | 1.155768            | 0.52564<br>0                    | 0.48625<br>5       |         | 0.33835<br>3      | 38.74                                    |
| meltingTemp*R2_substituent_phenyl        | -0.624613           | -<br>0.598389       |                | -0.579565           | -<br>0.26704<br>8               | -<br>0.25583<br>7  |         | -<br>0.27185<br>6 | 45.99                                    |
| meltingTe*meltingTem                     | -0.003335           | -<br>0.003431       |                | -0.002771           | -<br>0.21209<br>5               | -<br>0.21820<br>0  |         | -<br>0.19519<br>2 | 39.06                                    |

|                                           |        |        |        |                     |        |        |            |                   |       |
|-------------------------------------------|--------|--------|--------|---------------------|--------|--------|------------|-------------------|-------|
| PASS_antieczematic                        |        |        |        | -<br>207.95798<br>3 |        |        |            | -<br>0.25376<br>2 | 29.69 |
| TPSA                                      |        |        |        | -6.475011           |        |        |            | -<br>0.69666<br>1 | 47.20 |
| R1_substituent_2-pyridyl                  |        |        |        | 2.461317            |        |        |            | 0.00564<br>9      | 5.33  |
| meltingTemp*R2_substituent_4-methylphenyl |        |        |        | 0.255416            |        |        |            | 0.07177<br>3      | 29.27 |
| R <sup>2</sup>                            | 0.3646 | 0.3432 | 0.0000 | 0.4884              | 0.3646 | 0.3432 | 0.000<br>0 | 0.4884            |       |
| Adj R <sup>2</sup>                        | 0.2587 | 0.2516 | 0.0000 | 0.3369              | 0.2587 | 0.2516 | 0.000<br>0 | 0.3369            |       |
| #effects                                  | 8      | 7      | 1      | 9                   | 7      | 6      | 0          | 8                 |       |

Model 1 by Adj R<sup>2</sup>, Model 2 by AIC, Model 3 by AICC, Model 4 by BIC, Model 5 by C(p), Model 6 by SBC, Model 7 by ASE Val, \*\* p < 0.01, \* p < 0.05.

**Table S17.** *N. corralina*. Parameter estimates for LAR models were optimized by seven fit criteria.

| Parameter                                 | Estimate b <sub>i</sub>  |             |             | Standardized estimate β <sub>i</sub> |           |           | Mean selection percentage from Bootstrap |
|-------------------------------------------|--------------------------|-------------|-------------|--------------------------------------|-----------|-----------|------------------------------------------|
|                                           | Model 1, 2, 3, 4 and 5** | Model 6**   | Model 7     | Model 1, 2, 3, 4 and 5**             | Model 6** | Model 7   |                                          |
| Intercept                                 | 490.791006               | 258.196901  | 652.592448  | 0                                    | 0         | 0         |                                          |
| RmoExper                                  | 52.032957                | 59.227043   | 17.740635   | 0.161460                             | 0.183783  | 0.063229  | 78.08                                    |
| PASS_antieczematic                        | -304.981483              | -147.842937 | -267.471425 | -0.355874                            | -0.172514 | -0.343606 | 80.87                                    |
| TPSA                                      | -1.588766                |             | -1.818948   | -0.166473                            |           | -0.204866 | 38.70                                    |
| R1_substituent_phenyl                     | 20.793511                |             | -39.063691  | 0.035584                             |           | -0.077648 | 31.08                                    |
| meltingTemp*R2_substituent_4-methylphenyl | 0.402160                 |             |             | 0.111548                             |           |           | 30.22                                    |
| meltingTe*meltingTem                      | -0.001211                |             | -0.003084   | -0.077049                            |           | -0.196564 | 28.36                                    |
| PASS_antibact                             |                          |             | -70.797392  |                                      |           | -0.038473 | 10.23                                    |
| meltingTemp*R2_substituent_2-pyridyl      |                          |             | -0.058833   |                                      |           | -0.020235 | 9.95                                     |
| meltingTemp*R1_substituent_2-pyridyl      |                          |             | -0.086901   |                                      |           | -0.036219 | 8.17                                     |
| meltingTemp*R1_substituent_phenyl         |                          |             | 0.763482    |                                      |           | 0.271799  | 3.55                                     |
| R <sup>2</sup>                            | 0.3564                   | 0.2037      | 0.3525      | 0.3564                               | 0.2037    | 0.3525    |                                          |
| Adj R <sup>2</sup>                        | 0.2666                   | 0.1698      | 0.0876      | 0.2666                               | 0.1698    | 0.0876    |                                          |
| #effects                                  | 7                        | 3           | 10          | 6                                    | 2         | 9         |                                          |

Model 1 by Adj R<sup>2</sup>, Model 2 by AIC, Model 3 by AICC, Model 4 by BIC, Model 5 by C(p), Model 6 by SBC, Model 7 by ASE Val, \*\* p < 0.005.

**Table S18.** *M. luteus*. Parameter estimates for LASSO models were optimized by seven fit criteria.

| Parameter                                 | Estimate $b_i$  |                      |             | Standardized estimate $\beta_i$ |                      |           | Mean selection percentage from Bootstrap |
|-------------------------------------------|-----------------|----------------------|-------------|---------------------------------|----------------------|-----------|------------------------------------------|
|                                           | Model 1 and 5** | Model 2, 3,4 and 6** | Model 7*    | Model 1 and 5**                 | Model 2, 3,4 and 6** | Model 7*  |                                          |
| Intercept                                 | 227.082714      | 166.975667           | 1284.554674 | 0                               | 0                    | 0         |                                          |
| MW                                        | -0.308003       |                      |             | -0.033818                       |                      |           | 7.87                                     |
| RmoExper                                  | 141.095422      | 113.080473           |             | 0.383279                        | 0.307178             |           | 43.77                                    |
| Donors_H                                  | -10.570628      |                      | -91.164436  | -0.044362                       |                      | -0.478591 | 26.76                                    |
| meltingTemp*R2_substituent_2-pyridyl      | -0.151388       | -0.145607            | -0.200686   | -0.044220                       | -0.042532            | -0.070388 | 35.30                                    |
| meltingTe*meltingTem                      | -0.000805       |                      | -0.000491   | -0.048151                       |                      | -0.036244 | 24.03                                    |
| TPSA                                      |                 | -0.410882            | -2.560736   |                                 | -0.036767            | -0.273558 | 48.50                                    |
| PASS_antibact                             |                 |                      | 39.502309   |                                 |                      | 0.020738  | 5.14                                     |
| PASS_antiinflam                           |                 |                      | -233.401251 |                                 |                      | -0.190011 | 10.04                                    |
| PASS_antieczematic                        |                 |                      | -235.000140 |                                 |                      | -0.292914 | 19.31                                    |
| perc_C                                    |                 |                      | -6.882388   |                                 |                      | -0.142357 | 4.71                                     |
| meltingTemp*R2_substituent_4-methylphenyl |                 |                      | 0.420393    |                                 |                      | 0.152422  | 34.76                                    |
| R <sup>2</sup>                            | 0.2658          | 0.2257               | 0.3949      | 0.2658                          | 0.2257               | 0.3949    |                                          |
| Adj R <sup>2</sup>                        | 0.1924          | 0.1811               | 0.2192      | 0.1924                          | 0.1811               | 0.2192    |                                          |
| #effects                                  | 6               | 4                    | 10          | 5                               | 3                    | 10        |                                          |

Model 1 by Adj R<sup>2</sup>, Model 2 by AIC, Model 3 by AICC, Model 4 by BIC, Model 5 by C(p), Model 6 by SBC, Model 7 by PRESS, Model 8 by ASE Val, \*  $p < 0.05$ , \*\*  $p < 0.01$ .

**Table S19.** *M. luteus*. Parameter estimates for LAR models were optimized by seven fit criteria.

| Parameter                         | Estimate $b_i$     |                    |             | Standardized estimate $\beta_i$ |                    |           | Mean selection percentage from Bootstrap |
|-----------------------------------|--------------------|--------------------|-------------|---------------------------------|--------------------|-----------|------------------------------------------|
|                                   | Model 1, 4 and 5** | Model 2, 3 and 6** | Model 7*    | Model 1, 4 and 5**              | Model 2, 3 and 6** | Model 7*  |                                          |
| Intercept                         | 679.049013         | 112.717663         | 322.879777  | 0                               | 0                  | 0         |                                          |
| MW                                | -1.337928          |                    | -0.957184   | -0.146902                       |                    | -0.116891 | 29.77                                    |
| RmoExper                          | 179.101225         | 118.093581         | 192.224985  | 0.486520                        | 0.320796           | 0.569914  | 88.90                                    |
| PASS_antiinflam                   | -65.555614         |                    |             | -0.043515                       |                    |           | 17.54                                    |
| PASS_antieczematic                | -132.206055        |                    |             | -0.136558                       |                    |           | 54.89                                    |
| PASSp_antitumor                   | -205.642764        |                    | -265.326336 | -0.087989                       |                    | -0.121408 | 32.81                                    |
| PASS_antituberculosi              | 230.279990         |                    | 146.218794  | 0.117494                        |                    | 0.076520  | 37.37                                    |
| Donors_H                          | -22.861903         |                    | -0.035985   | -0.095945                       |                    | -0.014536 | 36.20                                    |
| meltingTemp*R1_substituent_phenyl | -0.142320          |                    | -0.015971   | -0.042786                       |                    | -0.005623 | 19.16                                    |
| meltingTemp                       | -0.734339          |                    | 1.071051    | -0.119317                       |                    | 0.177482  | 10.10                                    |
| meltingTe*meltingTem              |                    |                    | -0.006311   |                                 |                    | -0.398602 | 20.91                                    |
| R <sup>2</sup>                    | 0.4145             | 0.2217             | 0.4662      | 0.4145                          | 0.2217             | 0.4662    |                                          |
| Adj R <sup>2</sup>                | 0.2999             | 0.2072             | 0.2814      | 0.2999                          | 0.2072             | 0.2814    |                                          |

|          |    |   |    |   |   |   |  |
|----------|----|---|----|---|---|---|--|
| #effects | 10 | 2 | 10 | 9 | 1 | 9 |  |
|----------|----|---|----|---|---|---|--|

Model 1 by Adj R<sup>2</sup>, Model 2 by AIC, Model 3 by AICC, Model 4 by BIC, Model 5 by C(p), Model 6 by SBC, Model 7 by PRESS, Model 8 by ASE Val, \* p < 0.05, \*\* p < 0.005.

Table S20. *E. faecalis*. Parameter estimates for LASSO models were optimized by seven fit criteria.

| Paparameters                              | Estimate $b_i$ |                   |             |            | Standardized estimate $\beta_i$ |                   |          |           | Mean selection percentage from Bootstrap |
|-------------------------------------------|----------------|-------------------|-------------|------------|---------------------------------|-------------------|----------|-----------|------------------------------------------|
|                                           | Model 1        | Model 2, 3, and 6 | Model 4     | Model 7    | Model 1                         | Model 2, 3, and 6 | Model 4  | Model 7   |                                          |
| Intercept                                 | 144.857149     | 487.625000        | 323.111454  | 572.864635 | 0                               | 0                 | 0        | 0         |                                          |
| RmoExper                                  | 88.459161      |                   | 34.584429   |            | 0.179922                        |                   | 0.070343 | 0.179922  | 13.34                                    |
| miLOGP                                    | -39.988731     |                   |             |            | -0.118815                       |                   |          | -0.118815 | 16.26                                    |
| PASS_anti*PASS_antib                      | 2303.306977    |                   | 1684.609446 |            | 0.207126                        |                   | 0.151489 | 0.207126  | 41.79                                    |
| perc_N                                    | 3.714414       |                   |             |            | 0.033157                        |                   |          |           | 7.79                                     |
| meltingTemp*R2_substituent_2-pyridyl      | -0.150936      |                   |             |            | -0.033011                       |                   |          |           | 32.80                                    |
| meltingTemp*R2_substituent_4-methylphenyl | 0.741535       |                   | 0.539976    |            | 0.162220                        |                   |          |           | 29.40                                    |
| meltingTemp*R2_substituent_phenyl         | 0.978424       |                   | 0.826485    |            | 0.277974                        |                   |          |           | 38.30                                    |
| meltingTemp*R1_substituent_4-pyridyl      | -0.220836      |                   |             |            | -0.048152                       |                   | 0.118126 |           | 4.36                                     |
| meltingTe*meltingTem                      | 0.002152       |                   |             |            | 0.096386                        |                   | 0.234808 |           | 39.97                                    |
| Acceptors_H                               |                |                   |             | -18.344464 |                                 |                   |          | -0.073105 | 30.01                                    |
| R <sup>2</sup>                            | 0.2272         | 0.0000            | 0.1297      | 0.0184     | 0.2272                          | 0.0000            | 0.1297   | 0.0184    |                                          |
| Adj R <sup>2</sup>                        | 0.0760         | 0.0000            | 0.0614      | -0.0068    | 0.0760                          | 0.0000            | 0.0614   | -0.0068   |                                          |
| #effects                                  | 10             | 1                 | 5           | 2          | 9                               | 0                 | 4        | 1         |                                          |

Model 1 by Adj R<sup>2</sup>, Model 2 by AIC, Model 3 by AICC, Model 4 by BIC, Model 5 by C(p), Model 6 by SBC, Model 7 by ASE Val.

Table S21. *E. faecalis*. Parameter estimates for LAR models were optimized by seven fit criteria.

| Parameters | Estimate $b_i$ |                  |               |             | Standardized estimate $\beta_i$ |                  |               |         | Mean selection percentage from Bootstrap |
|------------|----------------|------------------|---------------|-------------|---------------------------------|------------------|---------------|---------|------------------------------------------|
|            | Model 1        | Model 2, 4 and 5 | Model 3 and 6 | Model 7     | Model 1                         | Model 2, 4 and 5 | Model 3 and 6 | Model 7 |                                          |
| Intercept  | 1169.480460    | 1123.391774      | 487.625000    | 1125.271690 | 0                               | 0                | 0             | 0       |                                          |

|                                          |                 |                 |        |                    |                   |                   |        |                   |       |
|------------------------------------------|-----------------|-----------------|--------|--------------------|-------------------|-------------------|--------|-------------------|-------|
| MW                                       | -2.937677       | -2.722742       |        | -3.320960          | -<br>0.24151<br>2 | -<br>0.22384<br>2 |        | -<br>0.27583<br>6 | 68.29 |
| RmoExper                                 | 99.945361       | 90.967652       |        | 118.7765<br>32     | 0.20328<br>5      | 0.18502<br>5      |        | 0.23951<br>5      | 43.34 |
| PASS_anti*PASS_ant<br>ib                 | 1320.0652<br>60 | 1187.3289<br>10 |        | 4045.720<br>303    | 0.11870<br>7      | 0.10677<br>1      |        | 0.33569<br>9      | 34.97 |
| PASS_antieczematic                       | -52.994244      | -36.812216      |        |                    | -<br>0.04098<br>6 | -<br>0.02847<br>1 |        |                   | 23.01 |
| PASSp_antitumor                          | -85.842044      | -98.045954      |        | -<br>40.84222<br>0 | -<br>0.02750<br>2 | -<br>0.03141<br>1 |        | -<br>0.01271<br>1 | 30.70 |
| PASS_antituberculos<br>i                 | 246.78730<br>5  | 238.23917<br>1  |        | 285.7004<br>51     | 0.09428<br>1      | 0.09101<br>5      |        | 0.10169<br>1      | 36.50 |
| meltingTemp*R2_su<br>bstituent_2-pyridyl | -0.123516       | -0.067971       |        |                    | -<br>0.02701<br>4 | -<br>0.01486<br>6 |        |                   | 17.34 |
| meltingTemp*R1_su<br>bstituent_2-pyridyl | 0.059717        |                 |        |                    | 0.01563<br>4      |                   |        |                   | 15.43 |
| meltingTe*meltingTe<br>m                 | 0.002743        | 0.002614        |        | 0.005906           | 0.12285<br>6      | 0.11709<br>7      |        | 0.25370<br>6      | 49.61 |
| R2_substituent_4-<br>nitrophenyl         |                 |                 |        | -<br>34.54857<br>1 | 0                 |                   |        | -<br>0.03520<br>5 | 6.50  |
| meltingTemp*R2_su<br>bstituent_phenyl    |                 |                 |        | -0.111360          |                   |                   |        | -<br>0.03059<br>6 | 20.10 |
| meltingTemp*R1_su<br>bstituent_4-pyridyl |                 |                 |        | -0.155663          |                   |                   |        | -<br>0.03141<br>5 | 5.20  |
| R <sup>2</sup>                           | 0.2763          | 0.2581          | 0.0000 | 0.3632             | 0.2763            | 0.2581            | 0.0000 | 0.3632            |       |
| Adj R <sup>2</sup>                       | 0.1348          | 0.1318          | 0.0000 | 0.1428             | 0.1348            | 0.1318            | 0.0000 | 0.1428            |       |
| #effects                                 | 10              | 9               | 1      | 10                 | 9                 | 8                 | 0      | 9                 |       |

Model 1 by Adj R<sup>2</sup>, Model 2 by AIC, Model 3 by AICC, Model 4 by BIC, Model 5 by C(p), Model 6 by SBC, Model 7 by ASE Val.

Table S22. *M. smegmatis*. Parameter estimates for LASSO models were optimized by seven fit criteria.

| Parameter          | Estimate b <sub>i</sub> |                      |                |                    | Standardized estimate β <sub>i</sub> |                      |         |                   | Mean selection percentage from Bootstrap |
|--------------------|-------------------------|----------------------|----------------|--------------------|--------------------------------------|----------------------|---------|-------------------|------------------------------------------|
|                    | Model 1*                | Model 2, 3, 4 and 5* | Model 6        | Model 7            | Model 1*                             | Model 2, 3, 4 and 5* | Model 6 | Model 7           |                                          |
| Intercept          | 567.4764<br>83          | 957.20526<br>1       | 389.5529<br>41 | 773.1238<br>25     | 0                                    | 0                    | 0       | 0                 |                                          |
| MW                 | -3.688674               | -2.901385            |                | -0.667514          | -<br>0.39210<br>3                    | -0.308415            |         | -<br>0.06877<br>1 | 74.36                                    |
| PASS_antibact      | 108.1846<br>35          |                      |                |                    | 0.03840<br>1                         |                      |         |                   | 20.07                                    |
| PASS_antieczematic | -<br>196.1092<br>10     | -<br>137.35841<br>0  |                |                    | -<br>0.18769<br>3                    | -0.131464            |         |                   | 52.97                                    |
| perc_C             | 14.81184<br>3           | 7.367446             |                |                    | 0.23260<br>4                         | 0.115698             |         |                   | 33.57                                    |
| Acceptors_H        | 29.90126<br>7           |                      |                | -<br>22.80354<br>1 | 0.14202<br>5                         |                      |         | -<br>0.10065<br>6 | 40.59                                    |



|                                      |                    |           |        |           |                   |           |        |                   |       |
|--------------------------------------|--------------------|-----------|--------|-----------|-------------------|-----------|--------|-------------------|-------|
| R1_substituent_2-pyridyl             | -<br>26.06315<br>0 |           |        |           | -<br>0.04578<br>3 |           |        |                   | 28.19 |
| R2_substituent_4-nitrophenyl         | 29.15913<br>9      | 57.636476 |        |           | 0.03527<br>8      | 0.069732  |        |                   | 27.47 |
| meltingTemp*R2_substituent_2-pyridyl | -1.494195          | -1.317898 |        | -0.522966 | -<br>0.40036<br>6 | -0.353128 |        | -<br>0.13895<br>1 | 64.79 |
| meltingTemp*R2_substituent_phenyl    | -0.879063          | -0.694533 |        |           | -<br>0.31951<br>5 | -0.252443 |        |                   | 61.11 |
| meltingTemp*R1_substituent_4-pyridyl | -0.546309          | -0.384363 |        |           | -<br>0.16335<br>5 | -0.114930 |        |                   | 49.83 |
| meltingTemp*meltingTemp              | 0.003409           | 0.002611  |        |           | 0.20720<br>2      | 0.158709  |        |                   | 54.79 |
| R <sup>2</sup>                       | 0.2646             | 0.2307    | 0.0000 | 0.1055    | 0.2646            | 0.2307    | 0.0000 | 0.1055            |       |
| Adj R <sup>2</sup>                   | 0.1538             | 0.1497    | 0.0000 | 0.0575    | 0.1538            | 0.1497    | 0.0000 | 0.0575            |       |
| #effects                             | 12                 | 9         | 1      | 4         | 11                | 8         | 0      | 3                 |       |

Model 1 by Adj R<sup>2</sup>, Model 2 by AIC, Model 3 by AICC, Model 4 by BIC, Model 5 by C(p), Model 6 by SBC, Model 7 by ASE Val, \* p < 0.05.

**Table S23.** *M. smegmatis*. Parameter estimates for Stepwise models were optimized by eight fit criteria.

| Parameter          | Estimate b <sub>i</sub>       |             | Standardized estimate β <sub>i</sub> |           | Mean selection percentage from Bootstrap |
|--------------------|-------------------------------|-------------|--------------------------------------|-----------|------------------------------------------|
|                    | Model 1, 2, 3, 4, 5, 6 and 7* | Model 8*    | Model 1, 2, 3, 4, 5, 6 and 7*        | Model 8*  |                                          |
| Intercept          | 534.682604                    | 538.926425  | 0                                    | 0         |                                          |
| PASS_antitumor     | -684.232146                   | -770.053682 | -0.270800                            | -0.300081 | 19.39                                    |
| R <sup>2</sup>     | 0.0733                        | 0.0900      | 0.0733                               | 0.0900    |                                          |
| Adj R <sup>2</sup> | 0.0622                        | 0.0744      | 0.0622                               | 0.0744    |                                          |
| #effects           | 2                             | 2           | 1                                    | 1         |                                          |

Model 1 by Adj R<sup>2</sup>, Model 2 by AIC, Model 3 by AICC, Model 4 by BIC, Model 5 by C(p), Model 6 by SBC, Model 7 by PRESS, Model 8 by ASE Val, \* p < 0.05.

**Table S24.** *M. smegmatis*. Parameter estimates for LAR models were optimized by seven fit criteria.

| Parameter | Estimate b <sub>i</sub> |                |                |                |                | Standardized estimate β <sub>i</sub> |               |         |         |         | Mean selection percentage from Bootstrap |
|-----------|-------------------------|----------------|----------------|----------------|----------------|--------------------------------------|---------------|---------|---------|---------|------------------------------------------|
|           | Model 1 and 5           | Model 2 and 4  | Model 3        | Model 6        | Model 7        | Model 1 and 5                        | Model 2 and 4 | Model 3 | Model 6 | Model 7 |                                          |
| Intercept | 941.070<br>974          | 438.6154<br>69 | 417.7610<br>89 | 389.552<br>941 | 384.709<br>700 | 0                                    | 0             | 0       | 0       | 0       |                                          |
| MW        | -<br>1.20730<br>0       |                |                |                |                | -<br>0.1283<br>35                    |               |         |         |         | 65.04                                    |

|                                          |             |             |             |        |           |           |           |           |        |           |       |
|------------------------------------------|-------------|-------------|-------------|--------|-----------|-----------|-----------|-----------|--------|-----------|-------|
| PASS_anti*PASS_antib                     | 440.744394  |             |             |        |           | 0.044047  |           |           |        |           | 49.71 |
| PASS_antieczematic                       | -51.344029  |             |             |        |           | -0.049141 |           |           |        |           | 58.83 |
| PASSp_antitumor                          | -336.300973 | -211.485435 | -132.990879 |        |           | -0.133098 | -0.083700 | -0.052634 |        |           | 73.69 |
| PASS_antituberculosis                    | 154.392357  |             |             |        |           | 0.079631  |           |           |        |           | 60.67 |
| Donors_H                                 | 7.488815    |             |             |        |           | 0.027895  |           |           |        |           | 33.89 |
| TPSA                                     | -1.419848   |             |             |        | -0.108924 | -0.115155 |           |           |        | -0.007328 | 23.69 |
| R2_substituent_4-methylphenyl            | 80.805924   |             |             |        |           | 0.125622  |           |           |        |           | 53.43 |
| meltingTemp*R2_substituent_2-pyridyl     | -0.093006   | -0.115940   |             |        |           | -0.024921 | -0.031066 |           |        |           | 53.60 |
| meltingTemp*R2_substituent_4-nitrophenyl | 0.688231    |             |             |        |           | 0.144440  |           |           |        |           | 46.43 |
| meltingTemp*R1_substituent_4-pyridyl     | -0.170319   |             |             |        |           | -0.050928 |           |           |        |           | 48.11 |
| meltingTemp*R1_substituent_phenyl        | 0.249893    |             |             |        |           | 0.066349  |           |           |        |           | 48.21 |
| R <sup>2</sup>                           | 0.2277      | 0.0502      | 0.0257      | 0.0000 | 0.0045    | 0.2277    | 0.0502    | 0.0257    | 0.0000 | 0.0045    |       |
| Adj R <sup>2</sup>                       | 0.0989      | 0.0271      | 0.0140      | 0.0000 | 0.0000    | 0.0989    | 0.0271    | 0.0140    | 0.0000 | 0.0000    |       |
| #effects                                 | 13          | 3           | 2           | 1      | 2         | 12        | 2         | 1         | 0      | 1         |       |

Model 1 by Adj R<sup>2</sup>, Model 2 by AIC, Model 3 by AICC, Model 4 by BIC, Model 5 by C(p), Model 6 by SBC, Model 7 by ASE Val.

**Table S25.** Presence of main effects with positive and negative signs Tables 1-6 and S16-S24 for all considered bacterial strains *S. aureus* (SA), *M. luteus* (ML), *N. corallina* (NC), *E. faecalis* (EF), and *M. smegmatis* (MS).

| variable                  | positive sign                          | negative sign                          | sum in row |
|---------------------------|----------------------------------------|----------------------------------------|------------|
| MW                        | -                                      | EF (2), SA (3), ML (3), MS (2), NC (2) | 12         |
| RMoExper                  | NC (2), EF (3), ML (3)                 | -                                      | 8          |
| miLOGP                    | SA (1)                                 | EF (1)                                 | 2          |
| PASS_antibac              | ML (1), MS (1), SA (1)                 | EF (1)                                 | 4          |
| PASS_antibac*PASS_antibac | MS (1), EF (3)                         | -                                      | 4          |
| PASS_antitubercul         | EF (2), SA (1), ML (2), SA (1), MS (1) | -                                      | 7          |
| PASS_antiinflam           | SA (3)                                 | EF (3), NC (2), ML (3)                 | 11         |
| PASS_antitumor            | -                                      | MS (2), SA (3), NC (1), ML (1), EF (1) | 8          |
| PASS_antieczematic        | SA (3)                                 | MS (2), NC (3), ML (3), EF (1)         | 12         |
| TPSA                      | SA (1)                                 | NC (2), MS (1), ML (1)                 | 5          |
| Acceptors_H               | MS (1)                                 | NC (1), EF (1)                         | 3          |
| Donors_H                  | MS (1)                                 | ML (3), SA (1)                         | 5          |
| Perc_C                    | MS (1)                                 | SA (3), ML (1)                         | 5          |
| Perc_N                    | SA (2), EF (1)                         | -                                      | 3          |
| meltingTem*meltingTemp    | EF (3), MS (1), SA (1)                 | NC (3), ML (2), SA (1)                 | 11         |

|                             |                |        |   |
|-----------------------------|----------------|--------|---|
| meltingTemp                 | SA (1)         | ML (1) | 2 |
| R1_substituent_2-pyridyl    | MS (1)         | NC (2) | 3 |
| R1_substituent_4-pyridyl    | SA (1)         | -      | 1 |
| R1_substituent_phenyl       | NC (1)         | NC (1) | 2 |
| R2_substituent_nitrophenyl  | MS (1)         | SA (1) | 2 |
| R2_substituent_methylphenyl | MS (1), SA (1) | -      | 2 |

**Table S26.** Presence of main effects with positive and negative signs in Tables 1-6 and S16-S21 for four bacterial strains *S. aureus* (SA), *M. luteus* (ML), *N. corallina* (NC), and *E. faecalis* (EF).

| variable                    | positive sign                  | negative sign                  | sum in row |
|-----------------------------|--------------------------------|--------------------------------|------------|
| MW                          | -                              | EF (2), SA (3), ML (3), NC (2) | 10         |
| RMoExper                    | NC (2), EF (3), ML (3)         | -                              | 8          |
| miLOGP                      | SA (1)                         | EF (1)                         | 2          |
| PASS_antibac                | ML (1), SA (1)                 | EF (1)                         | 3          |
| PASS_antibac*PASS_antibac   | EF (3)                         | -                              | 3          |
| PASS_antitubercul           | EF (2), SA (1), ML (2), SA (1) | -                              | 6          |
| PASS_antiinflam             | SA (3)                         | EF (3), NC (2), ML (3)         | 11         |
| PASS_antitumor              | -                              | SA (3), NC (1), ML (1), EF (1) | 7          |
| PASS_antieczematic          | SA (3)                         | NC (3), ML (3), EF (1)         | 10         |
| TPSA                        | SA (1)                         | NC (2), ML (1)                 | 4          |
| Acceptors_H                 | -                              | NC (1), EF (1)                 | 2          |
| Donors_H                    | -                              | ML (3), SA (1)                 | 3          |
| Perc_C                      | -                              | SA (3), ML (1)                 | 5          |
| Perc_N                      | EF (1)                         | -                              | 2          |
| meltingTemp*meltingTemp     | EF (3), SA (1)                 | NC (3), ML (2), SA (1)         | 10         |
| meltingTemp                 | SA (1)                         | ML (1)                         | 2          |
| R1_substituent_2-pyridyl    | -                              | NC (2)                         | 2          |
| R1_substituent_4-pyridyl    | SA (1)                         | -                              | 1          |
| R1_substituent_phenyl       | NC (1)                         | NC (1)                         | 2          |
| R2_substituent_nitrophenyl  | -                              | SA (1)                         | 1          |
| R2_substituent_methylphenyl | SA (1)                         | -                              | 1          |
